# Supplementary material for: The ethylmalonyl-CoA pathway for methane-based biorefineries: a case study of using Methylosinus trichosporium OB3b, an alpha-proteobacterial methanotroph, for producing 2-hydroxyisobutyric acid and 1,3-butanediol from methane
Source: Royal Society of Chemistry journal article supplement (doi:10.1039/d1gc02866a), 2021-01-01

Supplementary Materials for “**The Ethylmalonyl-CoA Pathway for Methane-based Biorefineries: A Case Study of Using Methylosinus trichosporium OB3b, an Alpha-proteobacterial Methanotroph, for Producing 2-Hydroxyisobutyric Acid and 1,3-Butanediol from Methane**”

Dung Mai Hoang Anh<sup>‡</sup>, Thu Nguyen Thi<sup>‡</sup>, Yeol Lee Eun\*

Department of Chemical Engineering (Integrated Engineering), Kyung Hee University,  
Gyeonggi-do 17104, Republic of Korea

**\*Corresponding Author Information**

eunylee@khu.ac.kr; Tel: +82-31-201-3839; Fax: +82-31-204-8114

SUPPLEMENTARY MATERIALS

**Table S1.** List of primers used in this study.

| Number | Name                | Sequence (5' - 3')                                    |
|--------|---------------------|-------------------------------------------------------|
| 1      | rcm_EcoRI_FWD       | AAATGGGTCGCGGATCCGATGTTAGGTAAATTATTGAAAGAAGTTGA       |
| 2      | rcm_EcoRI_REV       | GCTTGTCGACGGAGCTCGTTACCCTATTTTTTCCCTACATGCT           |
| 3      | P89-RCM-FWD         | TTCACACAGGAAACAGCTATGTTAGGTAAATTATTGAAAGAAGTTGA       |
| 4      | P89-RCM-REV         | GCATCTTCCCGACAACCTAAGTTCCTCCTTTCAGCAAAAAACC           |
| 5      | P89BB_FWD           | TAGTTGTCGGGAAGATGCGT                                  |
| 6      | P89BB_REV           | AGCTGTTTCCTGTGTGAATACCT                               |
| 7      | pET28-Adhac_FWD     | AAATGGGTCGCGGATCCGATGAAAGTTACAAATCAAAAAGAAGT          |
| 8      | pET28-Adhac_REV     | GCTTGTCGACGGAGCTCGTAAATGATTTTATATAGATATCCT            |
| 9      | pET28-Adhe_FWD      | AAATGGGTCGCGGATCCGATGGCTGTTACTAATGTCGCTGA             |
| 10     | pET28-Adhe_REV      | GCTTGTCGACGGAGCTCGTTAAGCGGATTTTTTCGCTT                |
| 11     | pET28-Adhac-bld_FWD | CTCCGTCGACAAGCTTGCAGGAGATATAAATGATTAAAGACACGCTAGTTTCT |
| 12     | pET28-Adhac-bld_REV | GTGGTGGTGCTCGAGTGCACCGGCGAGTACACATCTTC                |
| 13     | pET28-Adhe-bld_FWD  | CTCCGTCGACAAGCTTGCAGGAGATATAAATGATTAAAGACACGCTAGTTTCT |
| 14     | pET28-Adhe-bld_REV  | GTGGTGGTGCTCGAGTGCACCGGCGAGTACACATCTTC                |
| 15     | P89-Adhac-bld_FWD   | TTCACACAGGAAACAGCTATGAAAGTTACAAATCAAAAAGAAGT          |
| 16     | P89-Adhac-bld_REV   | GCATCTTCCCGACAACCTAGGATATAGTTCCTCCTTTCAGCA            |
| 17     | P89-Adhe-bld_FWD    | TTCACACAGGAAACAGCTATGGCTGTTACTAATGTCGCTGA             |
| 18     | P89-Adhe-bld_REV    | GCATCTTCCCGACAACCTAATAGTTCCTCCTTTCAGCAA               |
| 19     | 16S-RT-F            | TATTGGACAATGGGCGCAAG                                  |
| 20     | 16S-RT-R            | CAGTGATTCCGAACAACGCT                                  |
| 21     | phaA3-RT -F         | TGACCGACGCCTTCAACAATTACC                              |
| 22     | phaA3 -RT -R        | CGTCCTGGTCGACGATCACGT                                 |
| 23     | phaB-RT -F          | GAACCTCGCTGTTCAACGTC                                  |
| 24     | phaB-RT -R          | GGCGGAATAATTGGTTTGGC                                  |
| 25     | Cro-RT -F           | CACGGTGATCGGCATGTATC                                  |
| 26     | Cro-RT -R           | GATCTCGACCACCACATGGA                                  |
| 27     | Ccr-RT -F           | AACCGCAAGGATTTCAAGGG                                  |
| 28     | Ccr-RT -R           | CGATGTCGACGTCCTTCTTG                                  |
| 29     | Epi-RT -F           | ACGGTGGTGTTTCGTCGAAC                                  |
| 30     | Epi-RT -R           | GGCTTGCCATGGGCGC                                      |
| 31     | Ecm-RT -F           | CTCTCGGACAAGGATTTTCGC                                 |
| 32     | Ecm-RT -R           | TTCTCATCCGTGACGCCATA                                  |
| 33     | Med-RT -F           | GTCGTCGGCAATAAGACCTG                                  |

|    |              |                                       |
|----|--------------|---------------------------------------|
| 34 | Med-RT -R    | GCCCTTATAGCCCTTCTCGT                  |
| 35 | Mch-RT -F    | ACTATGAGGTCGGCGAGAAG                  |
| 36 | Mch-RT -R    | AGATGATGCGCTTTCCGAAC                  |
| 37 | phaC-RT -F   | AACTTGCTCTCGTCGCTCTG                  |
| 38 | phaC-RT -R   | CGACAATCCCTTCTTCGATTGC                |
| 37 | F1-phaC- FWD | GGCGGGTCCTATTTTCGCC                   |
| 39 | F1-phaC- REV | CAACAGCTCATTTCAGAGATGTGGCCGAGGAATGCTG |
| 40 | F2-phaC- FWD | GCCGAGGAGCAGGACTGAGCAGTCCCACAATGCCCT  |
| 41 | F2-phaC- REV | ATGAGACGAATTTTCGCGCTTG                |
| 42 | ZeoR-FWD     | CTCTGAAATGAGCTGTTG                    |
| 43 | ZeoR-REV     | TCAGTCCTGCTCCTCGGC                    |

**Table S2.** List of RNA-seq datasets used in this study

| Sample name    | Overall alignment rate | Number of reads | Culture condition          | Source     |
|----------------|------------------------|-----------------|----------------------------|------------|
| NMS_Cu10_Rep1  | 96.92%                 | 25595084        | NMS 10uM CuSO <sub>4</sub> | This study |
| NMS_Cu10_Rep2  | 96.14%                 | 24578150        | NMS 10uM CuSO <sub>4</sub> | This study |
| REF_Cu_10_Rep1 | 88.85%                 | 29349680        | NMS 10uM CuSO <sub>4</sub> | SRX2391218 |
| REF_Cu_10_Rep2 | 89.72%                 | 32054084        | NMS 10uM CuSO <sub>4</sub> | SRX2391219 |
| REF_Cu_10_Rep3 | 81.33%                 | 39629235        | NMS 10uM CuSO <sub>4</sub> | SRX2391220 |
| REF_Cu_0_Rep1  | 88.85%                 | 29349680        | NMS no CuSO <sub>4</sub>   | SRX2391212 |
| REF_Cu_0_Rep2  | 75.59%                 | 28603376        | NMS no CuSO <sub>4</sub>   | SRX2391213 |
| REF_Cu_0_Rep3  | 77.83%                 | 22867261        | NMS no CuSO <sub>4</sub>   | SRX2391214 |

**Fig. S1)** Detection of PHB formation in wildtype and  $\Delta C$  strain (strain S2) by GC-MS. (a). GC-MS elution profiles showing the detection of methyl-3-hydroxybutyrate from the methanolized 3-hydroxybutyrate standard (PHB standard). No PHB formation was detected in  $\Delta C$  strain (b). Mass fragmentation patterns for the peaks detected in the GC-MS. (c). Comparison of PCR products from mutant strains and wildtype. WT= *M. trichosporium* OB3b wildtype, S1, S2, S3 = *M. trichosporium* OB3b recombinant strains obtained after gene knockout. +

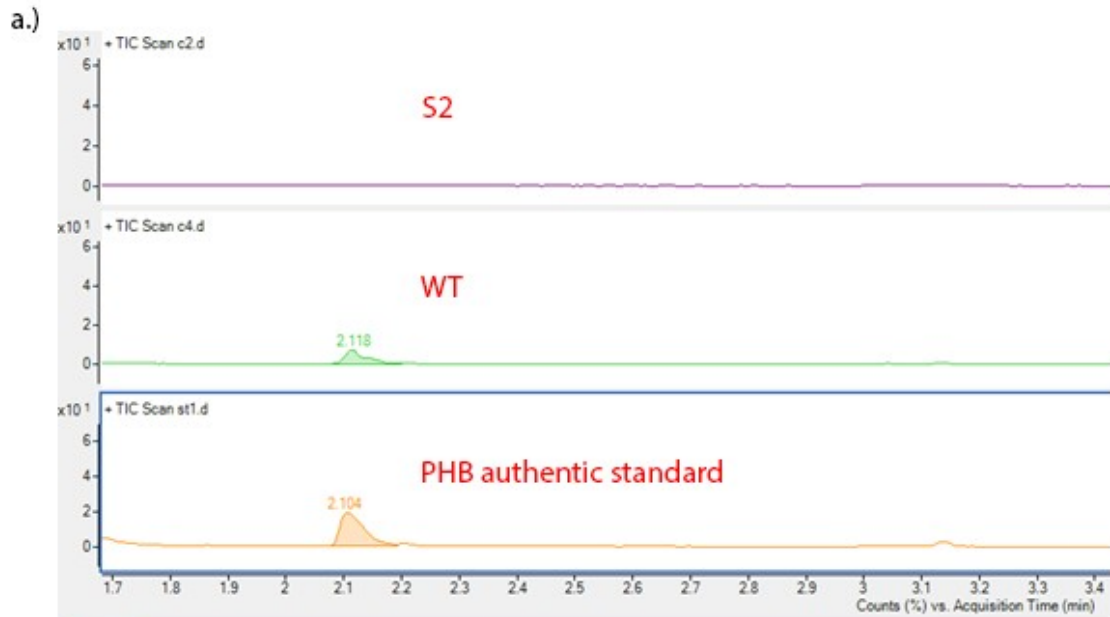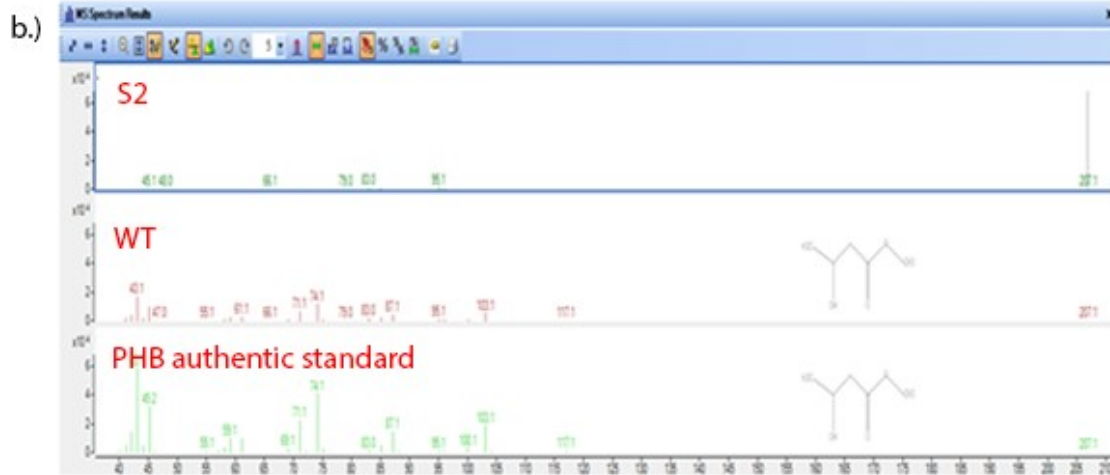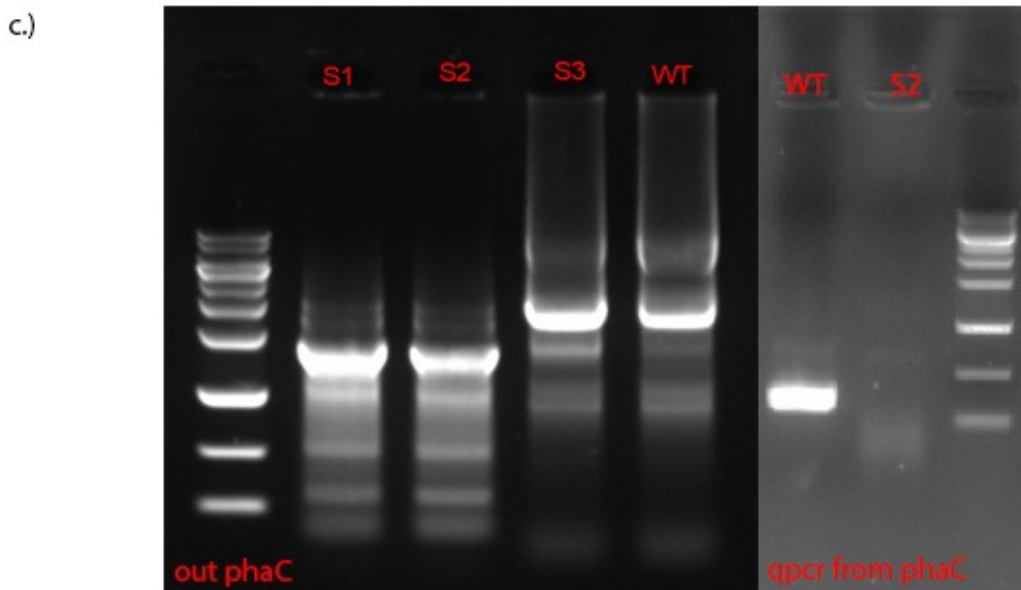

**Fig. S2)** Growth performance of phaC null mutant compared to wildtype. WT = *Methylophilus* *trichosporium* OB3b wildtype,  $\Delta$ C strain = phaC-knockout mutant of *M. trichosporium* OB3b.

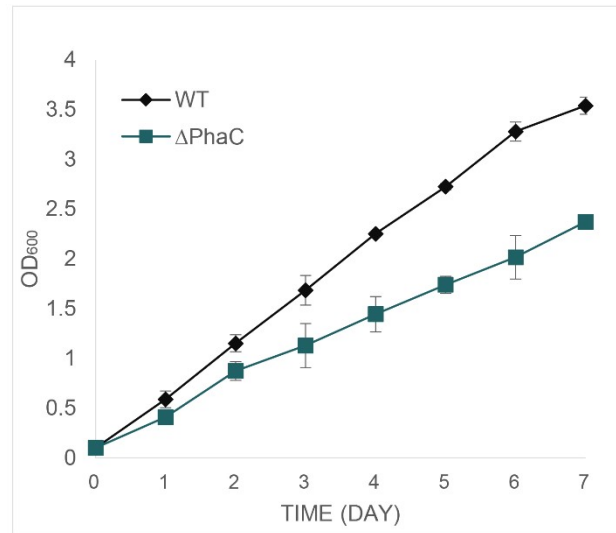

**Fig. S3)** Expression patterns of *M. trichosporium* OB3b phaC null mutant strain compared to *M. trichosporium* OB3b wildtype during PHB accumulation process. Data were analyzed by PCR package for R. mRNA expression of *M. trichosporium* OB3b phaC-knock out strain (DT\_PHB) and *M. trichosporium* OB3b wildtype in nitrogen limiting condition are compared and normalized against *M. trichosporium* OB3b wildtype cultured in NMS media. (n =3)

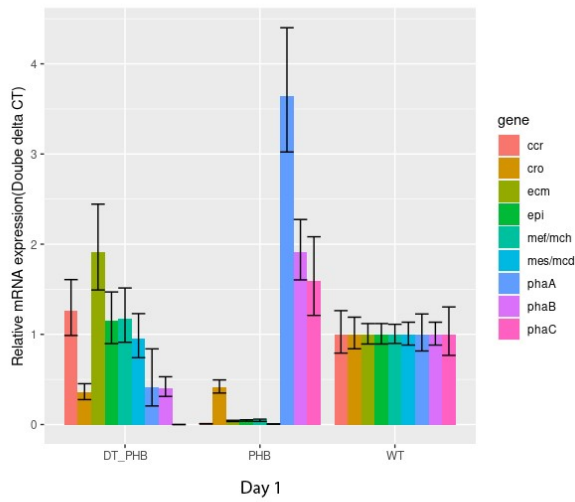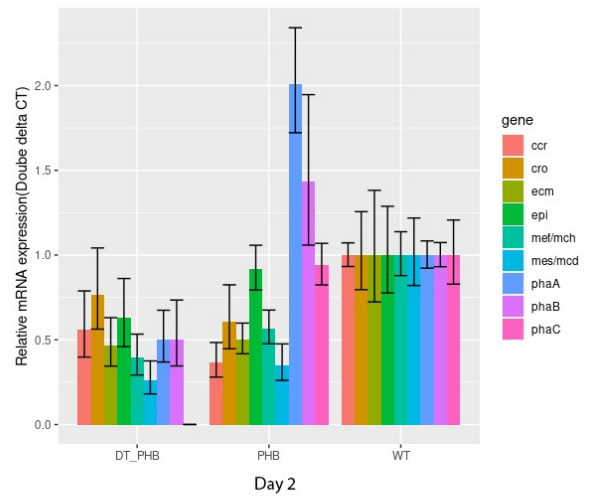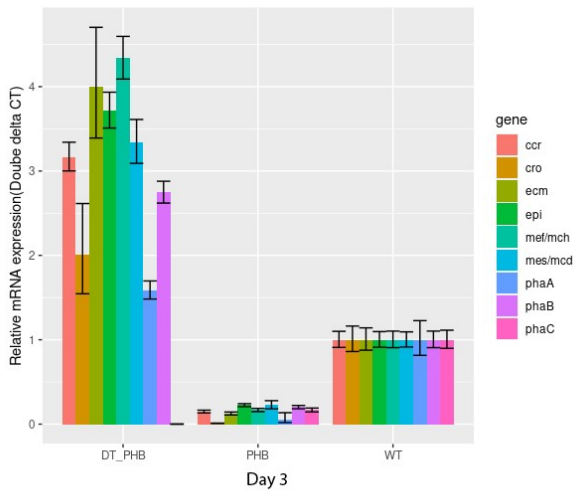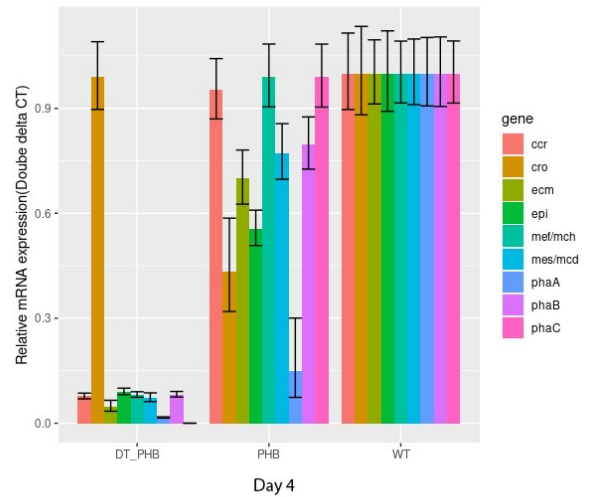

Under nitrogen-limiting conditions, in *M. trichosporium* OB3b wildtype *phaA* and *phaB* were upregulated after day 1. From day 1 to day 2, the other genes in the EMC pathway were downregulated. After day 3 all genes were downregulated and recovered on day 4.

For the *phaC* null mutant of *M. trichosporium* OB3b the expression patterns of all genes involved in the EMC pathways were different from the wildtype. On day 3 all genes in the EMC pathways were upregulated significantly and then decrease dramatically on day 4 in a similar way to day 3 of wildtype strain excepting the *cro* gene. The upregulation of *cro* in both strains is likely responsible for mediating (R)-3-hydroxy-butanoyl-CoA and crotonyl-CoA abundance when *ccr* and *ecm* were down regulated. It appeared that the EMC can actively shut down and reactivate in response to external stimuli. This might be a mechanism for actively controlling the concentration of toxic intermediate metabolites, such as glyoxylate.

**Fig. S4)** Product formation of 2-hydroxyisobutyric acid and 1,3-butanediol in recombinant strains.  
2HIBA standard = 200mg/L ; 1,3BDO standard = 400mg/L.

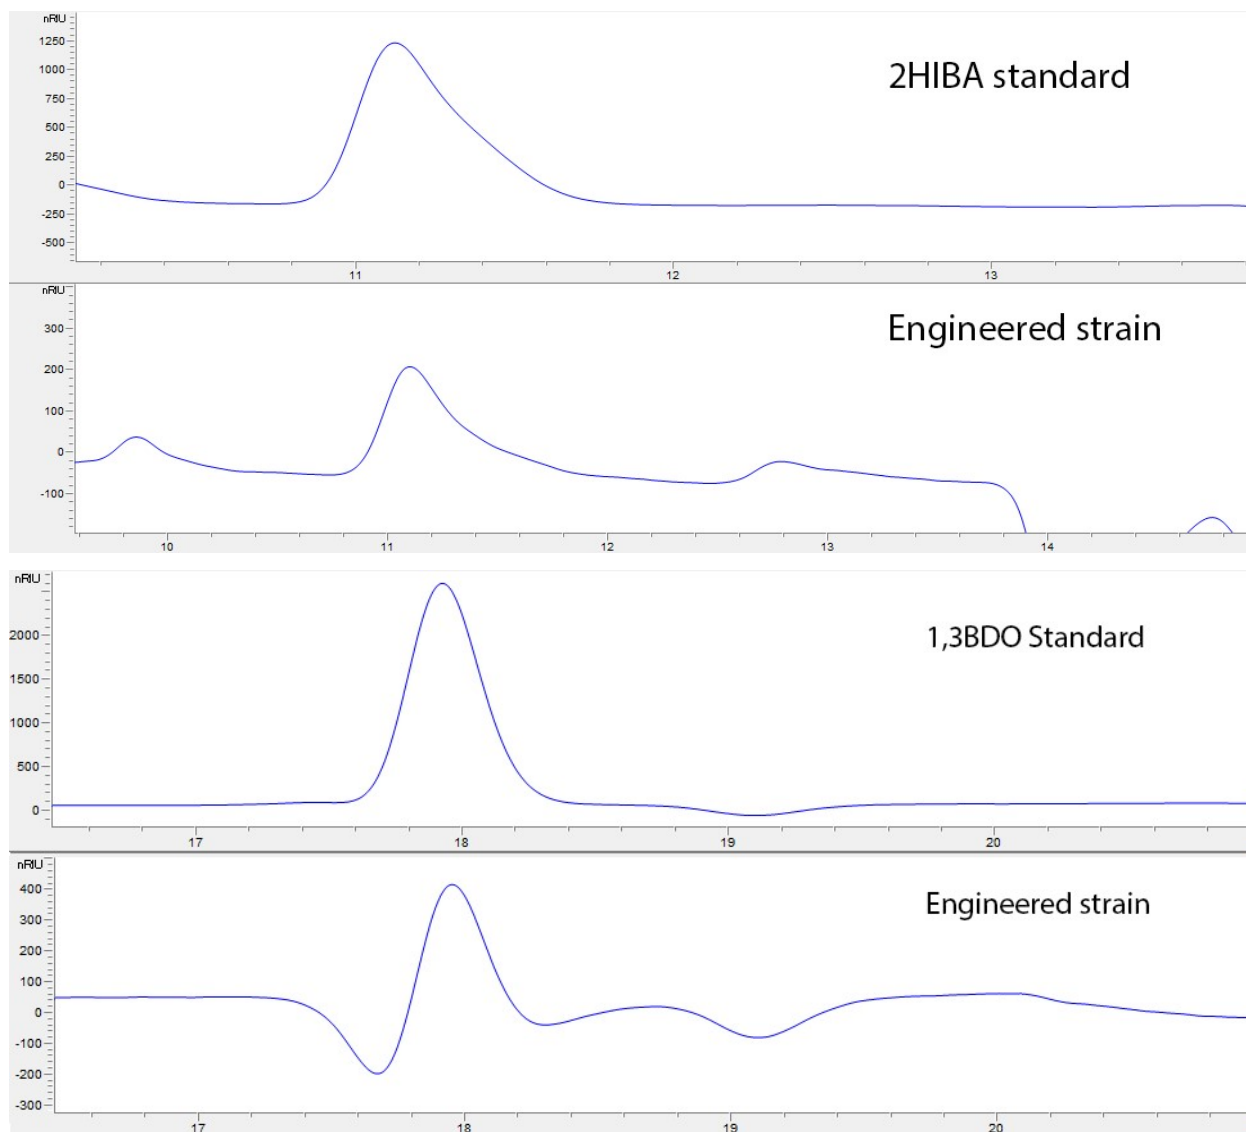

Supplement: d1gc02866a2.pdf [file d1gc02866a2.pdf]
