# Supplementary material for: The ethylmalonyl-CoA pathway for methane-based biorefineries: a case study of using Methylosinus trichosporium OB3b, an alpha-proteobacterial methanotroph, for producing 2-hydroxyisobutyric acid and 1,3-butanediol from methane
Source: Royal Society of Chemistry journal article supplement (doi:10.1039/d1gc02866a), 2021-01-01
Supplement: d1gc02866a1.xlsx [file d1gc02866a1.xlsx]

## Sheet: Sheet1
No	Enzyme name	ID	Replicate 1	Replicate 2	Cu_10	Cu_10	Cu_10	Cu0_1	Cu0_2	Cu0_3	Pathway	Abbreviation		No	Abbreviation	Metabolite name
1	acetyl-CoA C-acyltransferase 1	CQW49_12930	294.21	177.949	0	556.972	0	7.71496	4.13655	2.52633	EMC	phaA1		1	qh2	Ubiquinol
2	acetyl-CoA C-acyltransferase 2	CQW49_15495	9.00524	8.44035	29.6422	1.18327	0.368152	318.952	196.959	121.985	EMC	phaA2		2	q	Ubiquinone
3	acetyl-CoA C-acyltransferase 3	CQW49_17750	111.462	28.6115	0	8.11457	28.6992	103.154	137.887	189.621	EMC	phaA3		3	ficytc	Oxidized_cytochrome_c
4	beta-ketoacyl-ACP reductase	CQW49_17745	23.3515	21.6135	23.3515	21.6135	0	26.9286	115.682	16.8456	EMC	phaB		4	focytc	Reduced_cytochrome_c
5	3-hydroxybutyryl-CoA dehydratase	CQW49_12855	21.8811	14.7531	22.197	21.0431	20.3892	87.5321	98.9069	91.4955	EMC	cro		5	h4mpt	Tetrahydromethanopterin
6	crotonyl-CoA carboxylase/reductase	CQW49_03790	37.9603	2.84718	22.4522	0	19.1784	93.2499	93.0072	92.5584	EMC	ccr		6	510mh4mpt	5_10_methylenetetrahydromethanopterin
7	methylmalonyl-CoA/ethylmalonyl-CoA epimerase	CQW49_05270	214.007	126.402	133.552	188.018	154.574	791.105	748.724	549.562	EMC	epi		7	510methmpt	5_10_methenyltetrahydromethanopterin
8	ethylmalonyl-CoA mutase	CQW49_20150	35.9459	8.87612	11.2549	14.5447	34.9038	33.411	39.727	46.3937	EMC	ecm		8	5fthmpt	5_formyltetrahydromethanopterin
9	(2S)-methylsuccinyl-CoA dehydrogenase	CQW49_16350	16.3483	13.1293	10.2923	9.74509	9.52005	40.5151	46.3126	42.3524	EMC	mcd		9	10-formyl-THF	10_formyltetrahydrofolate
10	2-methylfumaryl-CoA hydratase	CQW49_03910	0.012312	0.174995	9.24754	6.55166	5.90255	27.2917	28.7185	38.1579	EMC	mch		10	Methenyl-THF	5_10_methenyltetrahydrofolate
11	malyl-CoA/(S)-citramalyl-CoA lyase	CQW49_12235	57.6674	38.4998	230.407	72.9254	123.281	303.016	459.018	735.852	EMC	mcl1		11	Methylene-THF	5_10_methylenetetrahydrofolate
12	Putative CoA ester lyase	CQW49_16215	0.008066	10.9189	0.199107	8.96086	8.87948	37.2059	43.1585	54.5772	EMC	mcl2		12	THF	Tetrahydrofolate
13	propionyl-CoA carboxylase beta subunit	CQW49_16085	29.233	22.4831	5.49702	13.7872	14.3594	57.3594	69.626	102.89	EMC	pcc1		13	Gly	Glycine
14	propionyl-CoA carboxylase alpha subunit	CQW49_20805	12.5074	0.798388	13.8075	8.27882	8.22354	34.4354	39.9281	56.7318	EMC	pcc2		14	Glx	Glyoxylate
15	methylmalonyl-CoA mutase 1	CQW49_17450	8.17966	6.89016	6.2879			12.4161	18.3148	25.7929	EMC	mcm1		15	Ser	L_serine
16	methylmalonyl-CoA mutase 2	CQW49_12550	14.0055	11.0969	12.9735	9.55218	9.46733	39.6435	45.851	53.4134	EMC	mcm2		16	HPYR	Hydroxypyruvate
17	acetyl-CoA C-acyltransferase 1	CQW49_12930	294.21	177.949	0	556.972	0	7.71496	4.13655	2.52633	PHB	phaA1		17	DGLYC	D_glycerate
18	acetyl-CoA C-acyltransferase 2	CQW49_15495	9.00524	8.44035	29.6422	1.18327	0.368152	318.952	196.959	121.985	PHB	phaA2		18	2PG	D_glycerate
19	acetyl-CoA C-acyltransferase 3	CQW49_17750	111.462	28.6115	0	8.11457	28.6992	103.154	137.887	189.621	PHB	phaA3		19	PEP	D_glycerate
20	beta-ketoacyl-ACP reductase	CQW49_17745	23.3515	21.6135	23.3515	21.6135	0	26.9286	115.682	16.8456	PHB	phaB		20	OAA	Oxaloacetate
21	3-hydroxyacyl-CoA dehydrogenase 1	CQW49_15500	6.06075	0.035795	27.1219	64.6153	35.3181	268.933	171.734	111.776	PHB	bdh1		21	MAL	S__malate
22	3-hydroxyacyl-CoA dehydrogenase 2	CQW49_20240	0	0	0.045933	51.5241	45.7012	213.761	221.777	202.02	PHB	bdh2		22	CIT	Citrate
23	polyhydroxyalkanoate synthase	CQW49_10945	72.273	54.3283	21.112	33.5407	0	139.406	123.635	83.1224	PHB	phaC		23	ICIT	Isocitrate
24	poly(3-hydroxybutyrate) depolymerase	CQW49_05565	0.249527	5.83542	13.3037	12.9077	11.5065	53.6478	55.8603	54.8457	PHB	phbZ		24	AKG	2_oxoglutarate
25	poly(3-hydroxybutyrate) depolymerase 2	CQW49_16675	275.568	112.879	0	0	108.254	457.69	433.131	393.405	PHB	phbZ2		25	SUCCOA	Succinyl_CoA
26	polyhydroxyalkanoate synthesis repressor PhaR	CQW49_20990	170.762	60.8048	79.9034	55.8367	0	231.706	270.758	281.532	PHB	phaR		26	SUCC	Succinate
27	acetoacetyl-CoA synthetase	CQW49_20795	41.7191	35.6416	7.73299	5.74936	5.7014	23.9167	27.6333	31.8759	PHB	oxct		27	FUM	Fumarate
28	serine hydroxymethyltransferase	CQW49_06365	34.1666	39.8775	51.3193	34.1666	34.695	142.027	168.258	211.431	Serine	glyA		28	PHB	Poly_beta_hydroxybutyrate
29	aminotransferase class V-fold PLP-dependent enzyme	CQW49_12200	51.5885	47.0689	92.0892	23.2399	34.1307	96.4509	165.916	379.517	Serine	sga		29	CoA	Coenzyme A
30	glycerate dehydrogenase	CQW49_12205	6.12954	5.08661	23.5828	7.89833	11.3747	32.8887	55.3219	97.1367	Serine	hpr		30	pi	Inorganic phosphate
31	glycerate 2-kinase	CQW49_12245	0.243952	4.62814	18.3214	9.61011	11.504	39.9573	55.8031	75.4178	Serine	gck		31	ATP	Adenosine triphosphate
32	phosphopyruvate hydratase	CQW49_08625	19.7687	18.2884	0	23.7403	21.4651	98.7304	103.862	135.61	Serine	eno		32	ADP	Adenosine diphosphate
33	phosphoenolpyruvate carboxylase 1	CQW49_05095	2.86518	0.125292	13.8149	8.21498	8.50998	34.1707	41.3098	56.9356	Serine	ppc1		33	NADH	Nicotinamide adenine dinucleotide - reduced
34	phosphoenolpyruvate carboxylase 2	CQW49_12230	1.54886	1.39634	12.3645	4.72683	6.31165	19.6435	30.5581	50.9374	Serine	ppc2		34	NADPH	Nicotinamide adenine dinucleotide phosphate - reduced
35	malate dehydrogenase	CQW49_18955	64.9724	39.2667	60.204	15.2461	17.9728	206.346	236.647	247.997	Serine	mdh		35	NAD+	Nicotinamide adenine dinucleotide
36	succinate--CoA ligase subunit alpha	CQW49_12225	14.0485	11.2474	66.5151	25.7685	32.0572	106.772	155.712	273.694	Serine	mcs1		36	NADP+	Nicotinamide adenine dinucleotide phosphate
37	ADP-forming succinate--CoA ligase subunit beta	CQW49_12220	11.607	8.71443	65.9072	27.4461	31.8995	113.848	154.805	271.406	Serine	mcs2		37	OxETF	Oxidized [electron-transfer flavoprotein]
38	malyl-CoA/(S)-citramalyl-CoA lyase	CQW49_12235	57.6674	38.4998	230.407	72.9254	123.281	303.016	459.018	735.852	Serine	mal		38	rETF	Reduced [electron-transfer flavoprotein]
39	citrate (Si)-synthase	CQW49_04750	21.2136	14.7858	72.4071	47.6585	50.7604	198.075	246.414	298.506	TCA	cs
40	aconitate hydratase	CQW49_13135	15.2121	11.304	50.0081	50.3887	11.4214	50.9906	55.3986	80.841	TCA	acont
41	isocitrate dehydrogenase (NADP(+))	CQW49_01450	1.22211	5.45549	7.03326	3.80648	7.43371	28.5638	36.1288	44.9692	TCA	icd
42	2-oxoglutarate dehydrogenase subunit E1	CQW49_16390	0.011716	0.052406	0.100371	18.9433	20.3533	78.8128	98.8247	121.918	TCA	akgd
43	dihydrolipoyl dehydrogenase	CQW49_06860	0.026559	10.1229	7.05146	0.138731	5.16514	26.6271	25.1109	29.0041	TCA	-
44	succinate--CoA ligase subunit alpha	CQW49_16385	213.018	350.532	379.427	185.932	121.416	770.948	588.231	532.312	TCA	sch1
45	succinyl-CoA synthetase beta subunit	CQW49_18950	39.3153	29.9217	44.8537	0.044439	0.09906	81.2893	112.716	184.894	TCA	sch2
46	succinate dehydrogenase, cytochrome b556 subunit	CQW49_10800	19.2446	13.6965	0	37.6459	36.3152	156.469	176.257	154.059	TCA	sucD1
47	succinate dehydrogenase, hydrophobic membrane anchor protein	CQW49_10805	18.6662	12.2291	35.0801	21.9856	22.5224	91.1832	109.709	144.215	TCA	sucD2
48	succinate dehydrogenase flavoprotein subunit	CQW49_10810	8.80565	6.23284	26.176	14.3826	15.8433	59.7616	76.8953	107.783	TCA	sucD3
49	succinate dehydrogenase iron-sulfur subunit 1	CQW49_10825	18.8368	12.346	33.1442	14.7979	16.7176	61.5546	81.1755	136.561	TCA	sucD4
50	succinate dehydrogenase iron-sulfur subunit 2	CQW49_22875	0	0	0	0	0	0	0	0	TCA	sucD5
51	succinate dehydrogenase, cytochrome b556 subunit 2	CQW49_22880	0	0	0	0	0	0	0	0	TCA	sucD6
52	succinate dehydrogenase, hydrophobic membrane anchor protein 2	CQW49_22885	0	0	0	0	0	0	0	0	TCA	sucD7
53	fumarate hydratase, class II	CQW49_13245	13.809	10.8591	14.0124	12.4879	12.9956	51.9787	63.0966	57.6803	TCA	fumH
54	malate dehydrogenase	CQW49_18955	64.9724	39.2667	60.204	15.2461	17.9728	206.346	236.647	247.997	TCA	fumD
55	PQQ-dependent dehydrogenase, methanol/ethanol family 1	CQW49_14425	315.683	322.432	0	0	0	1578.58	2259.83	4152.38	C1	mdh1
56	PQQ-dependent dehydrogenase, methanol/ethanol family 2	CQW49_15840	77.2559	45.0022	11.085	14.86	13.1412	61.8088	63.6905	45.6633	C1	mdh2
57	c-type cytochrome, methanol metabolism-related	CQW49_14390	35.9921	31.0756	14.0304	19.3092	12.8615	80.2411	62.3892	57.8675	C1	-
58	PQQ-dependent dehydrogenase, methanol/ethanol family	CQW49_14395	0	0	23.9741	42.3859	28.2681	176.195	137.097	98.6973	C1	mdh3
59	moxJ methanol oxidation system protein MoxJ	CQW49_14430	36.1536	0.011358	228.817	27.6579	138.225	456.697	670.505	942.813	C1	-
60	moxG cytochrome c(L), periplasmic	CQW49_14435	80.9817	0.028473	407.797	14.3578	214.168	740.719	1039.48	1680.09	C1	cL
61	formate dehydrogenase subunit alpha	CQW49_16125	0.195845	10.1521	0.584693	0.956093	0.017218	3.99253	3.63444	2.40963	C1	fdh1
62	formate dehydrogenase 1	CQW49_16615	2739.91	1474.89	0	2.22844	0	158.76	169.618	212.841	C1	fdh2
63	formate dehydrogenase 2	CQW49_16630	0	0	0	0	0	385.343	353.037	397.082	C1	fdh3
64	formate dehydrogenase subunit gamma 3	CQW49_16635	5.13248	5.71754	124.061	5.89282	168.027	903.013	814.662	511.129	C1	fdh4
65	methane monooxygenase/ammonia monooxygenase subunit C1	CQW49_01215	1352.61	1168.52	1842.52	2954.35	1998.84	12291.4	9710.48	7599.41	C1	pmoC1
66	methane monooxygenase/ammonia monooxygenase subunit A1	CQW49_01220	673.879	601.683	221.281	378.302	244.914	1571.62	1188.81	910.696	C1	pmoA1
67	methane monooxygenase/ammonia monooxygenase subunit B1	CQW49_01225	642.672	635.755	311.238	539.94	334.966	2244.82	1626.32	1282.36	C1	pmoB1
68	methane monooxygenase/ammonia monooxygenase subunit B2	CQW49_10250	706.901	616.35	328.979	574.758	354.14	2388.02	1718.23	1354.77	C1	pmoB2
69	methane monooxygenase/ammonia monooxygenase subunit A2	CQW49_10255	757.05	613.143	233.526	398.751	258.823	1659.24	1257.37	962.876	C1	pmoA2
70	methane monooxygenase/ammonia monooxygenase subunit C2	CQW49_10260	1506.14	1462.61	1962.15	3139.73	2109.36	13045.6	10234.6	8081.4	C1	pmoC2
71	methane monooxygenase/ammonia monooxygenase subunit C3	CQW49_19210	316.298	202.858	28.2232	32.2468	29.2873	134.07	142.436	116.238	C1	pmoC3
72	Soluble methane monooxygenase component A alpha	CQW49_12480	12.2203	2.9244	16990.3	13323.6	12337.8	55396.7	59910.4	70040	C1	mmox
73	Soluble methane monooxygenase component beta	CQW49_12475	8.00442	2.24114	9165.4	3904.85	4996.49	16232.7	24258.5	37781.1	C1	mmoy
74	Soluble methane monooxygenase regulatory protein B	CQW49_12470	0	2.87169	11797.9	4956.66	6496.18	20606.7	31544.6	48645.1	C1	mmoB
75	Soluble methane monooxygenase, gramma subunit	CQW49_12465	0	3.73118	9321.52	4173.41	5220.47	17345.8	25341.4	38421.4	C1	mmoZ
76	Soluble methane monooxygenase, D subunit	CQW49_12460	3.76707	1.89826	2181.35	1977	1687.2	8217.06	8191.29	8989.85	C1	mmoD
77	Soluble methane monooxygenase, C subunit	CQW49_12455	0.229141	2.11915	1042.93	934.936	778.146	3887.11	3777.6	4299.53	C1	mmoC
78	Formaldehyde-activating enzyme 1	CQW49_09280	12.0746	0.089582	13.9747	6.88602	7.90547	28.575	38.3903	57.5408	C1	fae1
79	Formaldehyde-activating enzyme 2	CQW49_13475	297.262	181.349	2.69603	1.79128	1.89353	321.489	402.058	571.587	C1	fae2
80	Formaldehyde-activating enzyme 3	CQW49_13480	1396.72	1260.14	767.681	373.675	383.484	1730.01	2082.77	3606.59	C1	fae3
